CLINICAL PRACTICE

# Fast interpretation of thromboelastometry in non-cardiac surgery: reliability in patients with hypo-, normo-, and hypercoagulability

K. Görlinger<sup>1†</sup>, D. Dirkmann<sup>1†</sup>, C. Solomon<sup>2</sup> and A. A. Hanke<sup>3</sup>

<sup>1</sup> Klinik für Anästhesiologie und Intensivmedizin, Universitätsklinikum Essen, Universität Duisburg-Essen, Hufelandstraße 55, D-45122 Essen, Germany

<sup>2</sup> Klinik für Anästhesiologie, Perioperative Medizin und Allgemeine Intensivmedizin, Salzburger Landesklinikum SALK, Universitätsklinikum der Paracelsus Medizinischen Privatuniversität, Müllner Hauptstraße 48, A-5020 Salzburg, Austria

<sup>3</sup> Klinik für Anästhesiologie und Intensivmedizin, Medizinische Hochschule Hannover, Carl-Neuberg-Straße 1, D-30625 Hannover, Germany

\* Corresponding author. E-mail: klaus@goerlinger.net

## Editor's key points

- Rapid analysis of coagulation function is critical to intraoperative haemostatic therapy.
- Early variables assessed by rotational thromboelastometry might rapidly predict clot formation (maximum clot firmness, MCF).
- In a large retrospective analysis of patients undergoing non-cardiac surgery, the clot amplitude at 5, 10, or 15 min provided early linear correlation with MCF, which should be useful in managing severe bleeding.

**Background.** Conventional coagulation test are not useful to guide haemostatic therapy in severe bleeding due to their long turn-around time. In contrast, early variables assessed by point-of-care thromboelastometry (ROTEM<sup>®</sup>) are available within 10–20 min and increasingly used to guide haemostatic therapy in liver transplantation and severe trauma. However, the reliability of early ROTEM<sup>®</sup> variables to predict maximum clot firmness (MCF) in non-cardiac surgery patients with subnormal, normal, and supranormal MCF has not yet been evaluated.

**Methods.** Retrospective data of 14 162 ROTEM<sup>®</sup> assays (3939 EXTEM<sup>®</sup>, 3654 INTEM<sup>®</sup>, 3287 FIBTEM<sup>®</sup>, and 3282 APTTEM<sup>®</sup> assays) of patients undergoing non-cardiac surgery were analysed. ROTEM<sup>®</sup> variables [clotting time (CT), clot formation time (CFT),  $\alpha$ -angle, A5, A10, and A15] were related to MCF by linear or non-linear regression, as appropriate. The Bland–Altman analyses to assess the bias between early ROTEM<sup>®</sup> variables and MCF and receiver operating characteristics (ROC) were also performed.

**Results.** Taking the best and worst correlation coefficients for each assay type, CT ( $r=0.18–0.49$ ) showed the worst correlation to MCF. In contrast,  $\alpha$ -angle ( $r=0.85–0.88$ ) and CFT ( $r=0.89–0.92$ ) demonstrated good but non-linear correlation with MCF. The best and linear correlations were found for A5 ( $r=0.93–0.95$ ), A10 ( $r=0.96$ ), and A15 ( $r=0.97–0.98$ ). ROC analyses provided excellent area under the curve (AUC) values for A5, A10, and A15 (AUC=0.962–0.985).

**Conclusions.** Early values of clot firmness allow for fast and reliable prediction of ROTEM<sup>®</sup> MCF in non-cardiac patients with subnormal, normal, and supranormal MCF values and therefore can be used to guide haemostatic therapy in severe bleeding.

**Keywords:** blood coagulation; liver transplantation; measurement techniques; postpartum haemorrhage; thromboelastometry; trauma

Accepted for publication: 3 September 2012

Severe bleeding due to acquired coagulopathy is a major issue in several kinds of non-cardiac surgery such as liver transplantation, severe trauma, and postpartum haemorrhage. However, due to their long turn-around time, conventional coagulation tests performed in the central laboratory are not useful to guide haemostatic therapy in these clinical settings.<sup>1–4</sup> Therefore, many clinicians decide to base their haemostatic therapy on their own

experience or on red blood cell to fresh-frozen plasma ratios.<sup>5–7</sup> This practice can result in inappropriate transfusion of allogeneic blood products, which is associated with increased morbidity, mortality, and hospital costs.<sup>8–12</sup> In contrast, early variables assessed by point-of-care thromboelastometry (ROTEM<sup>®</sup>) are available within 10–20 min and are increasingly used to guide haemostatic therapy in patients with acquired coagulopathy.<sup>2 3 13–19</sup> Accordingly,

<sup>†</sup>These authors contributed equally to this manuscript.

coagulation management algorithms based on point-of-care testing and goal-directed first-line therapy with specific coagulation factor concentrates such as fibrinogen concentrate and prothrombin complex concentrate have recently been shown to be associated with a reduction in transfusion requirements and transfusion-associated adverse events, and also improved outcomes and reduced hospital costs.<sup>20–30</sup>

Maximum clot firmness (MCF) is one of the most important ROTEM<sup>®</sup> variables.<sup>2 4 13–18 26–30</sup> However, the reliability of early ROTEM<sup>®</sup> variables to predict MCF in non-cardiac patients with subnormal, normal, and supranormal MCF has not yet been evaluated for either ROTEM<sup>®</sup> or TEG<sup>®</sup>. Therefore, we tested the hypotheses that variables obtained early during point-of-care ROTEM<sup>®</sup> tests reliably predict the MCF that will be achieved. Specifically, we tested whether clotting time (CT), clot formation time (CFT),  $\alpha$ -angle, or early values of clot firmness (i.e. A5, A10, and A15) allow prediction of MCF in non-cardiac surgery patients with subnormal, normal, and supranormal MCF values using four different commercially available ROTEM<sup>®</sup> assays (EXTEM<sup>®</sup>, INTEM<sup>®</sup>, FIBTEM<sup>®</sup>, and APTEM<sup>®</sup>).

## Methods

### Ethics approval

This retrospective study was approved by the institutional Ethics Committee of the University Hospital Essen, Germany, and abides by the ethical principles for medical research outlined in the Declaration of Helsinki.

### Data collection

We retrospectively analysed data from our database including 14 162 ROTEM<sup>®</sup> assays performed in patients undergoing non-cardiac surgery (i.e. visceral surgery and liver transplantation, severe trauma, orthopaedic surgery, neurosurgery, urological surgery, gynaecological surgery, and postpartum haemorrhage). Four different commercially available ROTEM<sup>®</sup> assays (i.e. EXTEM<sup>®</sup>, APTEM<sup>®</sup>, FIBTEM<sup>®</sup>, and INTEM<sup>®</sup>) were included and reviewed for adequacy. Exclusion criteria were total runtime <35 or >120 min and signs of hyperfibrinolysis (i.e. clot lysis index after 30, 45, or 60 min <85% or any detected lysis onset time=time until clot firmness decreased by 15% compared with MCF). Overall, 3939 EXTEM<sup>®</sup>, 3282 APTEM<sup>®</sup>, 3287 FIBTEM<sup>®</sup>, and 3654 INTEM<sup>®</sup> assays were included in the study. The following ROTEM<sup>®</sup> variables were determined: CT, CFT,  $\alpha$ -angle, amplitude of clot firmness 5, 10, and 15 min after CT (A5, A10, and A15, respectively), and MCF.

### ROTEM<sup>®</sup> measurements

Thromboelastometry (ROTEM<sup>®</sup>, TEM International GmbH, Munich, Germany) is a whole blood viscoelastic test measuring CTs (CT and CFT), clotting dynamics (CFT and  $\alpha$ -angle), clot firmness (A5, A10, A15, and MCF), and clot stability over the time [CLI30, CLI45, CLI60, maximum lysis (ML),

and lysis onset time]. Owing to its high resistance to movement and agitation artifacts, it can be used as a mobile point-of-care device in the operating theatre or at the intensive care unit. The ROTEM<sup>®</sup> device provides four independent measuring channels and uses several test assays with two different activators. All assays analysed in the present study were performed according to the manufacturer's instructions using commercially available assays by a limited number of trained anaesthetists and nurses. In our institution, ROTEM<sup>®</sup> analysis is routinely performed at certain time points during liver transplantation and in cases of diffuse bleeding during other kinds of surgery. For screening purposes, we routinely perform different extrinsically activated assays (EXTEM<sup>®</sup>, FIBTEM<sup>®</sup>, and APTEM<sup>®</sup>) and a single intrinsically activated test (INTEM<sup>®</sup>). EXTEM<sup>®</sup> assays are activated using tissue factor and are thought to serve as a screening test sensitive to deficiencies of vitamin K-dependent coagulation factors, fibrinogen, factor XIII, and platelets. In the FIBTEM<sup>®</sup> assay, platelet function is abolished using cytochalasin D, a potent inhibitor of actin polymerization, an essential part of the platelets' cytoskeleton-mediated contractility apparatus. Accordingly, FIBTEM<sup>®</sup> allows for the detection of fibrinogen deficiency or fibrin polymerization disorders, for example, induced by dysfibrinogenemia, infused colloids, or by factor XIII deficiency. The APTEM<sup>®</sup> assay is similar to the EXTEM<sup>®</sup> test but contains additional aprotinin to block a potential fibrinolysis. Comparison of EXTEM<sup>®</sup> and APTEM<sup>®</sup> assays gives further insight in the diagnosis of hyperfibrinolysis and allows estimation of the efficacy of antifibrinolytic therapy. The INTEM<sup>®</sup> assay is based on intrinsic activation by ellagic acid providing information on the coagulation factors involved in the intrinsic pathway. Further details about thromboelastometry are described elsewhere.<sup>31</sup>

### Data analyses and statistics

Data were analysed separately for each ROTEM<sup>®</sup> assay. Furthermore, EXTEM<sup>®</sup> and FIBTEM<sup>®</sup> analyses were separated into three subgroups with subnormal (MCF<50 or <9 mm, respectively), normal (MCF=50–70 or 9–25 mm, respectively), and supranormal MCF (MCF>70 or >25 mm, respectively) according to the reference range for EXTEM<sup>®</sup> (MCF 50–70 mm) and FIBTEM<sup>®</sup> (MCF 9–25 mm).<sup>32</sup> Since data were not normally distributed, according to a Kolmogorov–Smirnov test using the Dallal and Wilkinson approximation to Lilliefors' method, data are shown as median (25th; 75th percentile) (range). To test our hypothesis that CT, CFT,  $\alpha$ -angle, A5, A10, and A15 values correlate with MCF, each variable was compared with the corresponding MCF by fitting a linear regression and calculating Spearman's correlation coefficient  $\rho$ . A runs test (Wald–Wolfowitz test) was performed for each analysis to test if the curve fits by non-linear regression deviates significantly from the data.

The Bland–Altman analyses<sup>33 34</sup> were performed to calculate the mean difference (bias) [standard deviation (SD)] between the early values of clot firmness (A5, A10, and

A15, respectively) and MCF. For EXTEM<sup>®</sup> and FIBTEM<sup>®</sup> A10 values, this was done separately for analyses presenting sub-normal, normal, supranormal MCF, and pooled data, as well, to see whether this resulted in different bias values.

Optimal threshold values for all tested variables to predict a subnormal MCF in EXTEM<sup>®</sup>, APTM<sup>®</sup>, and INTEM<sup>®</sup> (MCF<50 mm) and FIBTEM<sup>®</sup> (MCF<9 mm) were calculated using receiver operating characteristics (ROC).<sup>35 36</sup> Results for ROC analyses are given as area under the curve (AUC), *P*-value, sensitivity [95% confidence interval (CI)], and specificity (95% CI). Optimal cut-off values (threshold) were calculated as the Youden index.<sup>37</sup> Where applicable, a *P*-value of <0.05 was considered statistically significant.

Results

Descriptive data

Data were collected from our database of patients undergoing different kinds of non-cardiac surgery (visceral surgery and liver transplantation, severe trauma, orthopaedic surgery, neurosurgery, urological surgery, gynaecological surgery, and postpartum haemorrhage). A total of 14 162 ROTEM<sup>®</sup> analyses were included (3939 EXTEM<sup>®</sup>, 3654 INTEM<sup>®</sup>, 3287 FIBTEM<sup>®</sup>, and 3282 APTM<sup>®</sup> assays, respectively). Descriptive data of all analysed ROTEM<sup>®</sup> variables (i.e. CT, CFT,  $\alpha$ -angle, A5, A10, A15, and MCF) are shown as median (25th; 75th percentile) (range) in Table 1 indicating a wide range for all variables analysed. According to EXTEM<sup>®</sup> MCF, 1935 analyses (49.1%) present subnormal MCF values (EXTEM<sup>®</sup> MCF<50 mm), 1864 analyses (47.3%) were within the reference range of 50–70 mm, and 140 analyses (3.6%) presented supranormal MCF values (EXTEM<sup>®</sup> MCF>70 mm). With regard to FIBTEM<sup>®</sup> MCF, 469 analyses (14.3%) presented values below the reference range (FIBTEM<sup>®</sup> MCF<9 mm), 2552 analyses (77.6%) were within the reference range of 9–25 mm, and 266 analyses (8.1%) presented values above the reference range (FIBTEM<sup>®</sup> MCF>25 mm) (Table 2).

Spearman’s correlation

Correlation coefficients for all variables and assays analysed are listed in Table 3. Specifically, CT showed neither good linear nor non-linear correlation (*r*=0.18–0.49). Accordingly, no line of agreement is given in the figures (Figs 1A and 2A). CFT (Fig. 1B) and  $\alpha$ -angle (Fig. 1C) fared better, but linear regression did not fit appropriately. Accordingly, non-linear regression (*r*=0.89–0.92 and 0.85–0.88, respectively) was used and a runs test (Wald–Walfowitz test) demonstrated a good fit for these variables. Early values of clot firmness (A5, A10, and A15) showed an excellent linear correlation with MCF for all assays analysed (*r*=0.93–0.95, 0.96, and 0.97–0.98, respectively). Data given above in parentheses represent the worst and the best correlation coefficient obtained from the four different assays (EXTEM<sup>®</sup>, INTEM<sup>®</sup>, FIBTEM<sup>®</sup>, and APTM<sup>®</sup>). Exemplary graphs demonstrating the respective correlations for all variables of EXTEM<sup>®</sup> and FIBTEM<sup>®</sup> assays are shown in Figures 1 and 2.

**Table 1** Descriptive data for all ROTEM<sup>®</sup> variables analysed. Data are shown for each assay and are presented as median (25th; 75th percentile) (range). CT, clotting time; CFT, clot formation time; A5, A10, A15, amplitude of clot firmness 5, 10, and 15 min after CT; MCF, maximum clot firmness

| Assay (n)                    | CT (s)                    | CFT (s)                  | $\alpha$ -Angle (°) | A5 (mm)            | A10 (mm)             | A15 (mm)           | MCF (mm)           |
|------------------------------|---------------------------|--------------------------|---------------------|--------------------|----------------------|--------------------|--------------------|
| EXTEM <sup>®</sup> (n=3939)  | 63 (51; 86) (20–1057)     | 153 (100; 248) (11–5160) | 64 (53; 72) (14–87) | 29 (22; 38) (3–79) | 39 (31; 39) (2–83)   | 44 (35; 53) (2–84) | 50 (42; 57) (5–90) |
| APTEM <sup>®</sup> (n=3282)  | 74 (59; 100) (21–905)     | 162 (106; 262) (18–3943) | 63 (51; 71) (12–86) | 28 (21; 37) (3–78) | 38 (29; 47.5) (4–84) | 43 (34; 52) (3–86) | 49 (42; 57) (5–88) |
| FIBTEM <sup>®</sup> (n=3287) | 63 (51; 81) (21–1100)     | n.a.                     | n.a.                | 9 (7; 13) (2–55)   | 10 (7; 14) (2–65)    | 11 (8; 15) (2–68)  | 14 (10; 18) (4–79) |
| INTEM <sup>®</sup> (n=3654)  | 211 (173; 270) (101–1166) | 142 (92; 238) (25–3466)  | 67 (56; 74) (14–85) | 30 (22; 38) (4–76) | 39 (30; 48) (2–82)   | 44 (35; 52) (3–84) | 49 (42; 49) (5–88) |

**Table 2** Bias for A10 values of EXTEM<sup>®</sup> and FIBTEM<sup>®</sup> in patients with subnormal, normal, and supranormal MCF and pooled data as obtained from the Bland–Altman analyses. The reference range for EXTEM<sup>®</sup> MCF is 50–70 mm and for FIBTEM<sup>®</sup> MCF 9–25 mm.<sup>32</sup> Bias data are presented as means (SD). *r*, Spearman's coefficient  $\rho$  for each assay and range for linear regression; MCF, maximum clot firmness; A10, amplitude of clot firmness 10 min after CT

| Assay (n)                    | MCF range (mm) | A10 bias (mm) | <i>r</i> |
|------------------------------|----------------|---------------|----------|
| EXTEM <sup>®</sup> (n=3939)  | Overall        | 10.03 (3.86)  | 0.96     |
| EXTEM <sup>®</sup> (n=1935)  | <50            | 11.08 (3.60)  | 0.90     |
| EXTEM <sup>®</sup> (n=1864)  | 50–70          | 9.27 (3.63)   | 0.89     |
| EXTEM <sup>®</sup> (n=140)   | >70            | 5.64 (4.87)   | 0.56     |
| FIBTEM <sup>®</sup> (n=3287) | Overall        | 3.44 (2.06)   | 0.96     |
| FIBTEM <sup>®</sup> (n=469)  | <9             | 1.95 (0.86)   | 0.70     |
| FIBTEM <sup>®</sup> (n=2552) | 9–25           | 3.43 (1.49)   | 0.93     |
| FIBTEM <sup>®</sup> (n=266)  | >25            | 6.24 (4.29)   | 0.83     |

**Table 3** Spearman's correlation coefficient  $\rho$  for each ROTEM<sup>®</sup> assay. Correlation coefficients are listed for non-linear regression of CT, CFT, and  $\alpha$ -angle to MCF and for linear regression of A5, A10, and A15 to MCF. CT, clotting time; CFT, clot formation time; MCF, maximum clot firmness; A5, A10, A15, amplitude of clot firmness 5, 10, and 15 min after CT, respectively

| Assay (n)                    | CT (s) | CFT (s) | $\alpha$ -Angle (°) | A5 (mm) | A10 (mm) | A15 (mm) |
|------------------------------|--------|---------|---------------------|---------|----------|----------|
| EXTEM <sup>®</sup> (n=3939)  | 0.32   | 0.89    | 0.85                | 0.93    | 0.96     | 0.97     |
| APTEM <sup>®</sup> (n=3282)  | 0.31   | 0.92    | 0.88                | 0.94    | 0.96     | 0.97     |
| FIBTEM <sup>®</sup> (n=3287) | 0.18   | n.a.    | n.a.                | 0.95    | 0.96     | 0.97     |
| INTEM <sup>®</sup> (n=3654)  | 0.49   | 0.91    | 0.87                | 0.94    | 0.96     | 0.98     |

### Bland–Altman analyses

Specific bias as obtained from the Bland–Altman analyses for A5, A10, and A15 values for EXTEM<sup>®</sup>, APTEM<sup>®</sup>, FIBTEM<sup>®</sup> and INTEM<sup>®</sup> assays are listed in Table 4.

### Difference in patients presenting subnormal, normal, or supranormal MCF values

The bias for A10 values of EXTEM<sup>®</sup> and FIBTEM<sup>®</sup> in patients with subnormal (MCF<50 or <9 mm, respectively), normal (MCF 50–70 or 9–25 mm, respectively), and supranormal MCF values (MCF>70 or >25 mm, respectively) and pooled data as obtained from the Bland–Altman analyses are presented in Table 2, and also the respective Spearman's coefficients  $\rho$  for linear regression.

### Receiver operating characteristics

ROC curve analyses demonstrated that CT provided only poor AUC values (0.614–0.74), indicating a low overall test

performance, for all assays analysed. In contrast, CFT and  $\alpha$ -angle (AUC=0.943–0.967 and 0.915–0.935, respectively) (both analysed for EXTEM<sup>®</sup>, APTEM<sup>®</sup>, and INTEM<sup>®</sup> assays only) and also A5, A10, and A15 performed excellently (AUC=0.962–0.976, 0.974–0.982, and 0.981–0.985, respectively). ROC curves of variables are shown in Figure 3A–D for all assays analysed. Results of all ROC curve analyses are given in Table 5 as AUC with respective *P*-values and calculated optimal cut-off values (thresholds) with respective sensitivity (95% CI) and specificity (95% CI).

## Discussion

Our retrospective study analysing data of 14 162 ROTEM<sup>®</sup> assays from non-cardiac patients demonstrates that early values of clot firmness (A5, A10, or A15, respectively) serve best in approximating the MCF achieved in ROTEM<sup>®</sup> measurements. In contrast, CFT and  $\alpha$ -angle performed worse and furthermore showed non-linear correlation, making it difficult to apply clinically. CT showed the worst correlation with MCF and seems not useful for the prediction of MCF.

In EXTEM<sup>®</sup>, the bias between A10 and MCF decreases slightly with increasing MCF. This might be due to progressive platelet retraction in the case of a high platelet count or platelet hyperreactivity.<sup>38</sup> However, the difference between the bias in the group presenting subnormal MCF values and the bias calculated for all EXTEM<sup>®</sup> analyses is only 1.05 mm (about 2% of the corresponding MCF). Therefore, this can be neglected for therapeutic decisions. In patients presenting supranormal MCF values, the bias is remarkably lower [5.64 (4.87) vs 10.03 (3.86) mm], but in this patient population, a procoagulant haemostatic intervention is not indicated.

Notably, in FIBTEM<sup>®</sup>, the bias between A10 and MCF increases with increasing MCF. This might be due to progressive fibrin polymerization due to high plasma fibrinogen concentrations. Since the bias in patients presenting subnormal MCF values is 1.49 mm lower compared with that in the whole patient population, the calculated dose of fibrinogen substitution tends to turn out a bit lower (about 10 mg fibrinogen per kilogram bodyweight).<sup>29</sup> On the other hand, the risk of fibrinogen overdose is reduced by this difference in the bias.

MCF in FIBTEM<sup>®</sup> assays has been demonstrated to correlate well with plasma fibrinogen concentration in patients undergoing major surgery or liver transplantation or suffering from trauma or postpartum haemorrhage.<sup>3 13 15–18 39</sup> Accordingly, fast and reliable assessment of plasma fibrinogen concentration is of interest since plasma fibrinogen concentration and MCF in FIBTEM<sup>®</sup> assays have been shown to have an excellent predictive value for perioperative bleeding complications and need for massive transfusion in trauma, scoliosis surgery, postpartum haemorrhage, and cardiac surgery.<sup>2 17 40–43</sup> Furthermore, FIBTEM<sup>®</sup>-guided administration of fibrinogen concentrate has been shown to be associated with reduced transfusion requirements in patients after severe trauma or undergoing



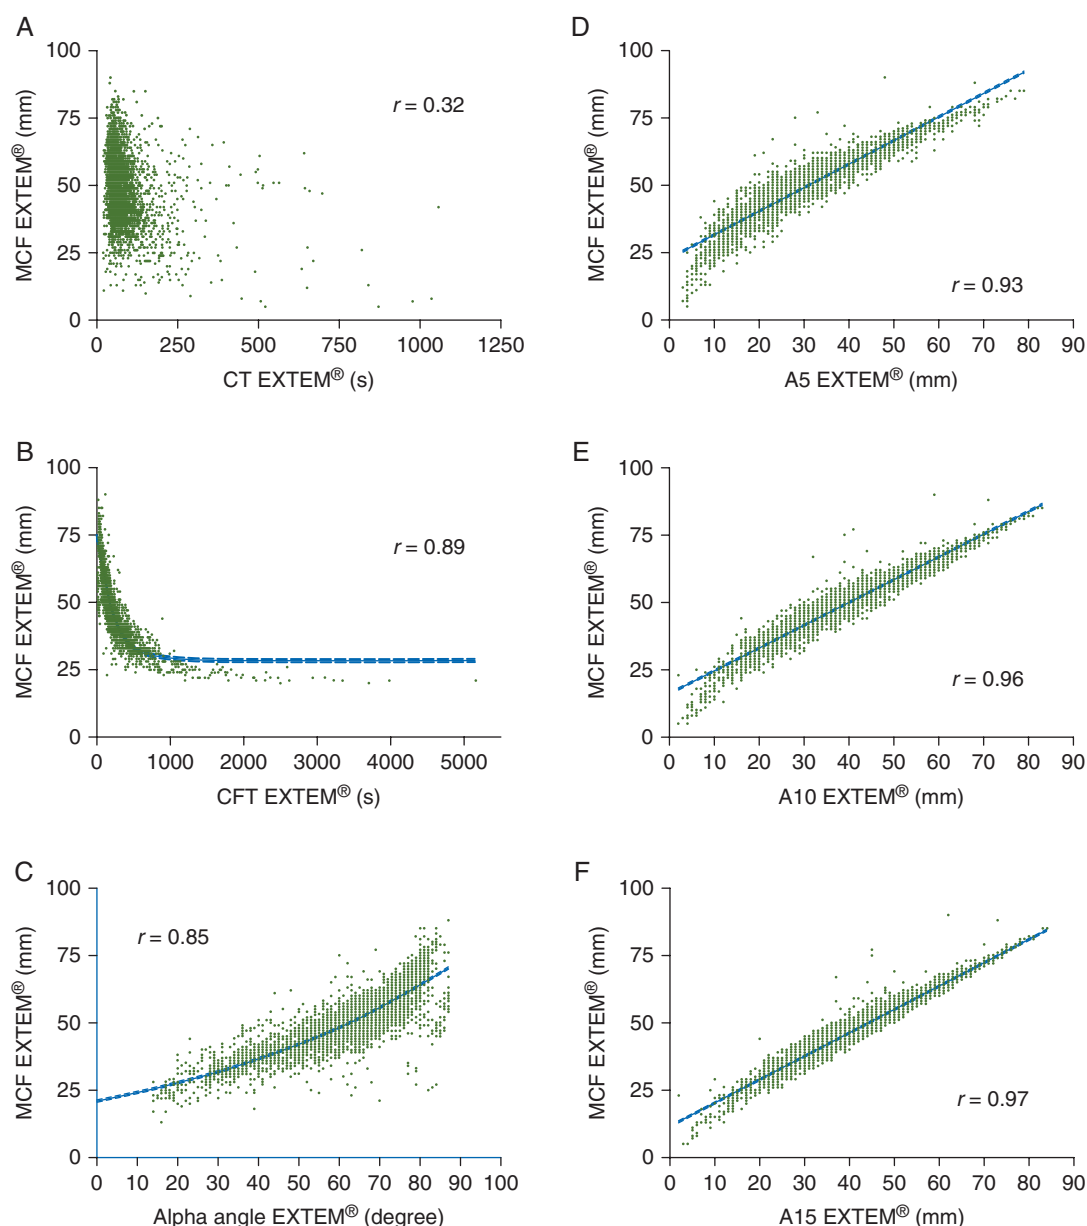

**Fig 1** Graphs for EXTEM<sup>®</sup> variables demonstrating poor correlation between CT and MCF (A) and good non-linear correlation between CFT (B) and  $\alpha$ -angle (C) and MCF, and excellent linear correlation between A5 (D), A10 (E), and A15 (F) and MCF, respectively. CT, clotting time; MCF, maximum clot firmness; CFT, clot formation time; A5, A10, A15, amplitude of clot firmness 5, 10, and 15 min after CT, respectively.

major surgery without an increased incidence of thrombo-embolic events.<sup>20 23–30 44</sup> Accordingly, an early and reliable assessment of plasma fibrinogen concentration and the detection of fibrin polymerization disorders by MCF in FIBTEM<sup>®</sup> assays should accelerate clinical decision-making with regard to therapy with fibrinogen containing blood products such as fresh-frozen plasma, cryoprecipitate, or fibrinogen concentrate. Furthermore, FIBTEM<sup>®</sup> provides not only an alternative assessment for plasma fibrinogen concentration but also adds additional information on fibrinogen polymerization defects due to dysfibrinogenaemia, often present in liver

cirrhosis, colloid infusion, or factor XIII deficiency.<sup>45</sup> In addition, hydroxyethylstarch solutions can evoke erroneously high fibrinogen concentration measurements yielded by coagulation analysers based on optical measurements.<sup>46</sup> Thus, assessing FIBTEM<sup>®</sup> MCF seems to be preferable to assess fibrin polymerization in patients after infusion of colloids, such as hydroxyethylstarch solutions. It is important to consider that ROTEM<sup>®</sup> results are influenced by haematocrit. Reduced haematocrit results in increased plasma fraction in the whole blood sample which can result in increased MCF.<sup>47–49</sup>

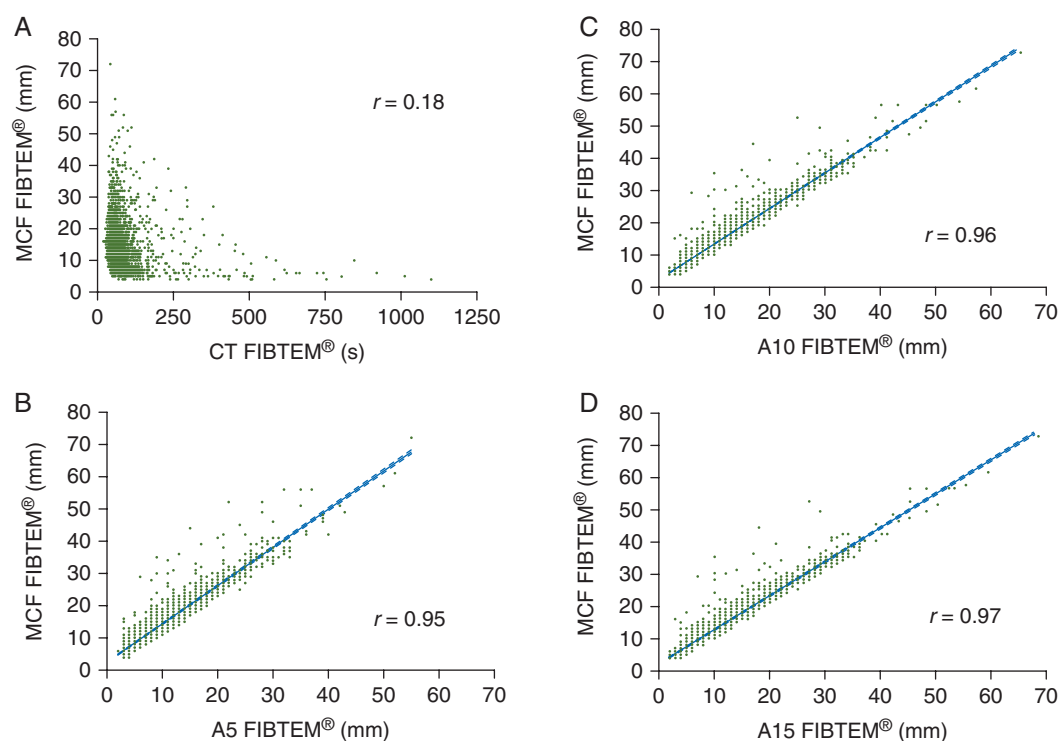

**Fig 2** Graphs for FIBTEM® variables demonstrating poor correlation between CT and MCF (A) and excellent linear correlation between A5 (B), A10 (C), and A15 (D) and MCF, respectively. CT, clotting time; MCF, maximum clot firmness; A5, A10, A15, amplitude of clot firmness 5, 10, and 15 min after CT, respectively.

**Table 4** Bias for A5, A10, and A15 values of all assays as obtained from the Bland–Altman analyses. Data are presented as means (sd). A5, A10, A15, amplitude of clot firmness 5, 10, and 15 min after CT, respectively

| Assay (n)        | A5 (mm)      | A10 (mm)     | A15 (mm)    |
|------------------|--------------|--------------|-------------|
| EXTEM® (n=3939)  | 19.07 (4.52) | 10.03 (3.86) | 5.76 (3.22) |
| APTEM® (n=3282)  | 19.07 (4.34) | 10.15 (3.79) | 5.92 (3.22) |
| FIBTEM® (n=3287) | 4.47 (2.51)  | 3.44 (2.06)  | 2.84 (1.91) |
| INTEM® (n=3654)  | 18.63 (4.14) | 9.89 (3.53)  | 5.67 (2.93) |

According to our data, early values of clot firmness can be used as an alternative assessment of MCF. A5 or A10 values in FIBTEM® assays can predict MCF. Based on our data, it seems appropriate to use A5 values by adding 4 mm ( $\pm 3$  mm) or A10 values by adding 3 mm ( $\pm 2$  mm) to predict MCF when using FIBTEM® assays. The difference in bias in FIBTEM® assays between patients with subnormal and normal MCF values was very small ( $<1.5$  mm) and therefore, can be neglected for clinical decision making.

MCF in EXTEM®, INTEM®, and APTEM® assays, respectively, is influenced by both, fibrinogen concentration/fibrin polymerization and platelet count with platelets responsible for the

main part of clot firmness. MCF in EXTEM® assays correlates well with platelet count and allows detection of thrombocytopenia during orthotopic liver transplantation.<sup>16 18 39</sup> For EXTEM® assay, 19 mm ( $\pm 5$  mm) have to be added to A5 values or 10 mm ( $\pm 4$  mm) to A10 values in order to approximate MCF. However, early parameters of ROTEM® are not clinically interchangeable with TEG® results because clot formation kinetics are strongly influenced by different reagents.<sup>50</sup>

In conclusion, our data demonstrate that early values of clot firmness allow for fast and reliable prediction of ROTEM® MCF in non-cardiac patients with subnormal, normal, and supranormal MCF values and therefore can be used to guide haemostatic therapy in severe bleeding. We recommend the use of A5 or A10 values since they exhibit an excellent linear correlation to MCF with a fixed bias for each ROTEM® test. This enables easy and fast calculation of MCF and a calculated targeted haemostatic therapy in daily clinical practice. We recommend using A10 values in routine and A5 values in the case of severe life-threatening bleeding. In contrast, CT, CFT, and  $\alpha$ -angle correlate poorly and non-linearly to MCF which makes them inappropriate to guide haemostatic therapy with regard to clot firmness in severe bleeding. However, this does not impair their value to estimate thrombin generation in this setting.

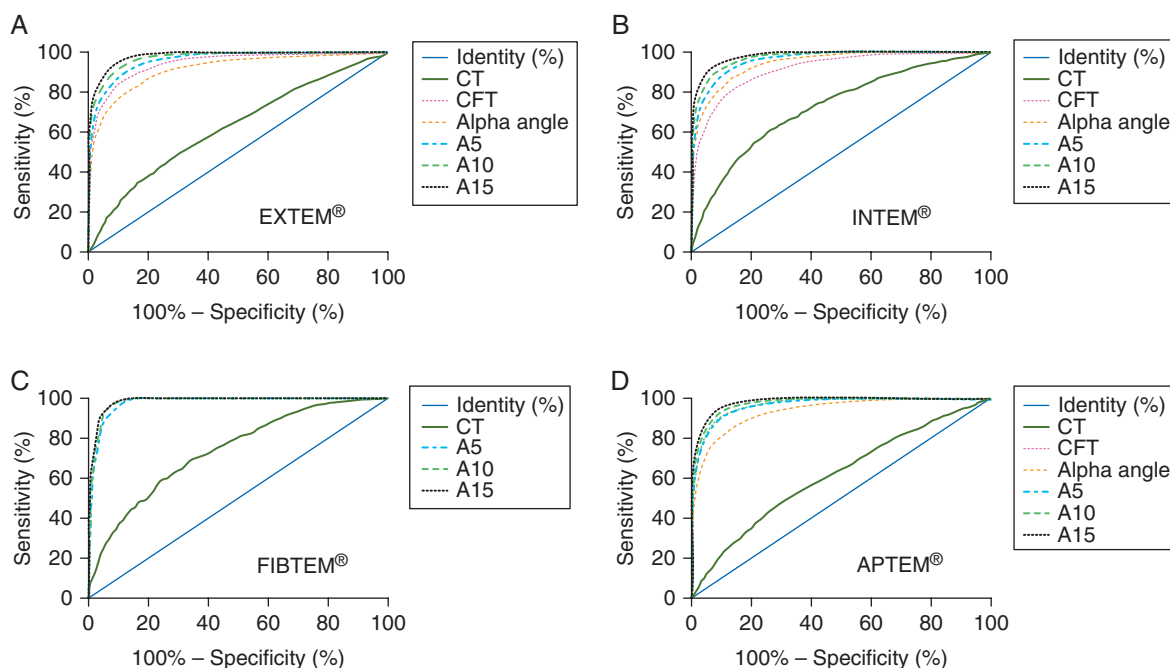

**Fig 3** ROC curves of CT, CFT,  $\alpha$ -angle, A5, A10, and A15 assays to predict subnormal MCF in (a) EXTEM®, (b) APTEM®, and (c) INTEM® (<50 mm) and in (d) FIBTEM® (<9 mm) assays. ROC, receiver operating characteristics CT, clotting time; CFT, clot formation time; A5, A10, A15, amplitude of clot firmness 5, 10, 15 min after CT; MCF, maximum clot firmness.

**Table 5** Results obtained from ROC. AUC as obtained from ROC shown with respective P-values, optimal cut-off values to predict subnormal MCF values (MCF<50 mm for EXTEM®, APTEM®, and INTEM® and MCF<9 mm for FIBTEM®), corresponding sensitivity (CI), and specificity (CI). CT, clotting time; CFT, clot formation time; A5, A10, A15, amplitude of clot firmness 5, 10, and 15 min after CT, respectively; MCF, maximum clot firmness

| Assay (n)        | Variable            | AUC; P-value   | Optimal cut-off | Sensitivity in % (CI) | Specificity in % (CI) |
|------------------|---------------------|----------------|-----------------|-----------------------|-----------------------|
| EXTEM® (n=3939)  | CT (s)              | 0.625; <0.0001 | >71.5           | 48.04 (45.79–50.29)   | 71.1 (69.06–73.08)    |
|                  | CFT (s)             | 0.943; <0.0001 | >163.5          | 84.46 (82.74–86.06)   | 89.77 (88.26–91.06)   |
|                  | $\alpha$ -Angle (°) | 0.915; <0.0001 | <62.5           | 80.81 (78.95–82.57)   | 86.58 (85.01–88.04)   |
|                  | A5 (mm)             | 0.962; <0.0001 | <29.5           | 89.82 (88.38–91.13)   | 87.87 (86.36–89.27)   |
|                  | A10 (mm)            | 0.974; <0.0001 | <39.5           | 92.56 (91.3–93.69)    | 89.22 (87.78–90.55)   |
|                  | A15 (mm)            | 0.982; <0.0001 | <43.5           | 91.94 (90.63–93.11)   | 92.86 (91.65–93.95)   |
|                  | A15 (mm)            | 0.982; <0.0001 | <43.5           | 91.94 (90.63–93.11)   | 92.86 (91.65–93.95)   |
| APTEM® (n=3282)  | CT (s)              | 0.614; <0.0001 | >83.5           | 46.42 (44.05–48.8)    | 71.33 (69.01–73.57)   |
|                  | CFT (s)             | 0.967; <0.0001 | >161.5          | 91.36 (89.85–92.72)   | 89.82 (88.21–91.28)   |
|                  | $\alpha$ -Angle (°) | 0.935; <0.0001 | <62.5           | 84.44 (82.61–86.15)   | 87.11 (85.34–88.74)   |
|                  | A5 (mm)             | 0.966; <0.0001 | <28.5           | 88.5 (86.9–89.96)     | 91.95 (90.48–93.25)   |
|                  | A10 (mm)            | 0.975; <0.0001 | <39.5           | 94.16 (92.95–95.22)   | 89.69 (88.07–91.16)   |
|                  | A15 (mm)            | 0.981; <0.0001 | <43.5           | 93.18 (91.89–94.32)   | 92.65 (91.24–93.9)    |
|                  | A15 (mm)            | 0.981; <0.0001 | <43.5           | 93.18 (91.89–94.32)   | 92.65 (91.24–93.9)    |
| FIBTEM® (n=3287) | CT (s)              | 0.740; <0.0001 | >69.5           | 69.08 (64.68–73.24)   | 65.97 (64.19–67.72)   |
|                  | A5 (s)              | 0.976; <0.0001 | <6.5            | 98.51 (96.95–99.4)    | 88.18 (86.93–89.35)   |
|                  | A10 (mm)            | 0.982; <0.0001 | <6.5            | 95.95 (93.75–97.54)   | 93.83 (92.87–94.69)   |
|                  | A15 (mm)            | 0.985; <0.0001 | <7.5            | 99.57 (98.47–99.95)   | 89.63 (88.45–90.73)   |
|                  | A15 (mm)            | 0.985; <0.0001 | <7.5            | 99.57 (98.47–99.95)   | 89.63 (88.45–90.73)   |
| INTEM® (n=3654)  | CT (s)              | 0.726; <0.0001 | >222.5          | 60 (57.73–62.24)      | 74.56 (72.48–76.55)   |
|                  | CFT (s)             | 0.946; <0.0001 | >139.5          | 87.73 (86.12–89.21)   | 85.92 (84.23–87.49)   |
|                  | $\alpha$ -Angle (°) | 0.918; <0.0001 | <66.5           | 80.55 (78.64–82.36)   | 86.59 (84.93–88.13)   |
|                  | A5 (mm)             | 0.963; <0.0001 | <29.5           | 88.27 (86.72–89.7)    | 89.86 (88.37–91.21)   |
|                  | A10 (mm)            | 0.975; <0.0001 | <38.5           | 88.97 (87.46–90.36)   | 93.02 (91.74–94.15)   |
|                  | A15 (mm)            | 0.983; <0.0001 | <43.5           | 92.16 (90.84–93.35)   | 93.57 (92.34–94.66)   |
|                  | A15 (mm)            | 0.983; <0.0001 | <43.5           | 92.16 (90.84–93.35)   | 93.57 (92.34–94.66)   |

## Declaration of interest

K.G. has received honoraria and travel funding for scientific lectures from Tem International GmbH, Munich, Germany, and CSL Behring GmbH, Marburg, Germany. D.D. has received honoraria and travel funding for scientific lectures from Tem International GmbH, Munich, Germany, and CSL Behring GmbH, Marburg, Germany. C.S. has received honoraria and travel funding for scientific lectures and research support from Tem International GmbH, Munich, Germany, and CSL Behring GmbH, Marburg, Germany. Since May 2012, C.S. has been employed as the Director of Medical Affairs for Acquired Bleeding of CSL Behring GmbH, Marburg, Germany. A.H. has received honoraria and travel funding for scientific lectures and research support from Tem International GmbH, Munich, Germany, and CSL Behring GmbH, Marburg, Germany.

## Funding

This study was funded by departmental sources. The study was performed without external grant support.

## References

- Toulon P, Ozier Y, Ankri A, Fléron MH, Leroux G, Samama CM. Point-of-care versus central laboratory coagulation testing during haemorrhagic surgery. A multicenter study. *Thromb Haemost* 2009; **101**: 394–401
- Davenport R, Manson J, De'Ath H, et al. Functional definition and characterization of acute traumatic coagulopathy. *Crit Care Med* 2011; **39**: 2652–8
- Haas T, Spielmann N, Mauch J, et al. Comparison of thromboelastometry (ROTEM®) with standard plasmatic coagulation testing in paediatric surgery. *Br J Anaesth* 2012; **108**: 36–41
- Johansson PI. Coagulation monitoring of the bleeding traumatized patient. *Curr Opin Anaesthesiol* 2012; **25**: 235–41
- Murad MH, Stubbs JR, Gandhi MJ, et al. The effect of plasma transfusion on morbidity and mortality: a systematic review and meta-analysis. *Transfusion* 2010; **50**: 1370–83
- Ho AM, Dion PW, Yeung JH, et al. Prevalence of survivor bias in observational studies on fresh frozen plasma:erythrocyte ratios in trauma requiring massive transfusion. *Anesthesiology* 2012; **116**: 716–28
- Wafaisade A, Lefering R, Maegele M, et al. Coagulation management of bleeding trauma patients is changing in German trauma centers: an analysis from the trauma registry of the German Society for Trauma Surgery. *J Trauma Acute Care Surg* 2012; **72**: 936–42
- Watson GA, Sperry JL, Rosengart MR, et al. Fresh frozen plasma is independently associated with a higher risk of multiple organ failure and acute respiratory distress syndrome. *J Trauma* 2009; **67**: 221–30
- Johnson JL, Moore EE, Kashuk JL, et al. Effect of blood products transfusion on the development of postinjury multiple organ failure. *Arch Surg* 2010; **145**: 973–7
- Inaba K, Branco BC, Rhee P, et al. Impact of plasma transfusion in trauma patients who do not require massive transfusion. *J Am Coll Surg* 2010; **210**: 957–65
- Borgman MA, Spinella PC, Holcomb JB, et al. The effect of FFP:RBC ratio on morbidity and mortality in trauma patients based on transfusion prediction score. *Vox Sang* 2011; **101**: 44–54
- Stanworth SJ, Grant-Casey J, Lowe D, et al. The use of fresh-frozen plasma in England: high levels of inappropriate use in adults and children. *Transfusion* 2011; **51**: 62–70
- Rugeri L, Levrat A, David JS, et al. Diagnosis of early coagulation abnormalities in trauma patients by rotation thrombelastography. *J Thromb Haemost* 2007; **5**: 289–95
- Goerlinger K, Dirkmann D, Hanke A, Dusse F, Hartmann M. ROTEM-based algorithm for point-of-care coagulation management in visceral surgery and liver transplantation: experience of eight years and 829 LTX. *Liver Transplant* 2008; **14**(Suppl. 1): S203–4
- Huissoud C, Carrabin N, Audibert F, et al. Bedside assessment of fibrinogen level in postpartum haemorrhage by thrombelastometry. *BJOG* 2009; **116**: 1097–102
- Roullet S, Pillot J, Freyburger G, et al. Rotation thromboelastometry detects thrombocytopenia and hypofibrinogenaemia during orthotopic liver transplantation. *Br J Anaesth* 2010; **104**: 422–8
- Schöchl H, Cotton B, Inaba K, et al. FIBTEM provides early prediction of massive transfusion in trauma. *Crit Care* 2011; **15**: R265
- Blasi A, Beltran J, Pereira A, et al. An assessment of thromboelastometry to monitor blood coagulation and guide transfusion support in liver transplantation. *Transfusion* 2012, doi: 10.1111/j.1537-2995.2011.03526.x. [Epub ahead of print]
- Haas T, Spielmann N, Mauch J, Speer O, Schmugge M, Weiss M. Reproducibility of thrombelastometry (ROTEM®): point-of-care versus hospital laboratory performance. *Scand J Clin Lab Invest* 2012; **72**: 313–7
- Görlinger K, Dirkmann D, Müller-Beisenhirtz H, Paul A, Hartmann M, Saner F. Thromboelastometry-based perioperative coagulation management in visceral surgery and liver transplantation: experience of 10 years and 1105 LTX. *Liver Transplant* 2010; **16**(Suppl. 1): S86
- Spahn DR, Ganter MT. Towards early individual goal-directed coagulation management in trauma patients. *Br J Anaesth* 2010; **105**: 103–5
- Ganter MT, Spahn DR. Active, personalized, and balanced coagulation management saves lives in patients with massive bleeding. *Anesthesiology* 2010; **113**: 1016–8
- Schöchl H, Nienaber U, Hofer G, et al. Goal-directed coagulation management of major trauma patients using thromboelastometry (ROTEM)-guided administration of fibrinogen concentrate and prothrombin complex concentrate. *Crit Care* 2010; **14**: R55
- Schöchl H, Nienaber U, Maegele M, et al. Transfusion in trauma: thromboelastometry-guided coagulation factor concentrate-based therapy versus standard fresh frozen plasma-based therapy. *Crit Care* 2011; **15**: R83
- Nienaber U, Innerhofer P, Westermann I, et al. The impact of fresh frozen plasma vs coagulation factor concentrates on morbidity and mortality in trauma-associated haemorrhage and massive transfusion. *Injury* 2011; **42**: 697–701
- Görlinger K, Dirkmann D, Weber CF, Rahe-Meyer N, Hanke AA. Algorithms for transfusion and coagulation management in massive haemorrhage. *Anästhesiologie Intensivmedizin* 2011; **52**: 145–59
- Görlinger K, Dirkmann D, Hanke AA, et al. First-line therapy with coagulation factor concentrates combined with point-of-care coagulation testing is associated with decreased allogeneic blood transfusion in cardiovascular surgery: a retrospective, single-center cohort study. *Anesthesiology* 2011; **115**: 1179–91
- Schöchl H, Maegele M, Solomon C, Görlinger K, Voelckel W. Early and individualized goal-directed therapy for trauma-induced coagulopathy. *Scand J Trauma Resusc Emerg Med* 2012; **20**: 15



- 29 Görlinger K, Fries D, Dirkmann D, Weber CF, Hanke AA, Schöchl H. Reduction of fresh frozen plasma requirements by perioperative point-of-care coagulation management with early calculated goal-directed therapy. *Transfus Med Hemother* 2012; **39**: 104–13
- 30 Weber CF, Görlinger K, Meininger D, et al. Point-of-care testing: a prospective randomized clinical trial of efficacy in coagulopathic cardiac surgery patients. *Anesthesiology* 2012; **117**: 531–47
- 31 Görlinger K, Jambor C, Hanke AA, et al. Perioperative coagulation management and control of platelet transfusion by point-of-care platelet function analysis. *Transfus Med Hemother* 2007; **34**: 396–411
- 32 Lang T, Bauters A, Braun SL, et al. Multi-centre investigation on reference ranges for ROTEM thromboelastometry. *Blood Coagul Fibrinolysis* 2005; **16**: 301–10
- 33 Bland JM, Altman DG. Statistical methods for assessing agreement between two methods of clinical measurement. *Lancet* 1986; **8476**: 307–10
- 34 Bland JM, Altman DG. Agreed statistics: measurement method comparison. *Anesthesiology* 2012; **116**: 182–5
- 35 Lasko TA, Bhagwat JG, Zou KH, Ohno-Machado L. The use of receiver operating characteristic curves in biomedical informatics. *J Biomed Inform* 2005; **38**: 404–15
- 36 Zou KH, O'Malley AJ, Mauri L. Receiver-operating characteristic analysis for evaluating diagnostic tests and predictive models. *Circulation* 2007; **115**: 654–7
- 37 Hilden J. The area under the ROC curve and its competitors. *Med Decis Making* 1991; **11**: 95–101
- 38 Katori N, Tanaka KA, Szlam F, Levy JH. The effects of platelet count on clot retraction and tissue plasminogen activator-induced fibrinolysis on thrombelastography. *Anesth Analg* 2005; **100**: 1781–5
- 39 Herbstreit F, Winter EM, Peters J, Hartmann M. Monitoring of haemostasis in liver transplantation: comparison of laboratory based and point of care tests. *Anaesthesia* 2010; **65**: 44–9
- 40 Charbit B, Mandelbrot L, Samain E, et al. The decrease of fibrinogen is an early predictor of the severity of postpartum hemorrhage. *J Thromb Haemost* 2007; **5**: 266–73
- 41 Karlsson M, Ternström L, Hyllner M, Baghaei F, Nilsson S, Jeppsson A. Plasma fibrinogen level, bleeding, and transfusion after on-pump coronary artery bypass grafting surgery: a prospective observational study. *Transfusion* 2008; **10**: 2152–8
- 42 Reinhöfer M, Brauer M, Franke U, Bar D, Marx G, Lösche W. The value of rotation thromboelastometry to monitor disturbed perioperative haemostasis and bleeding risk in patients with cardiopulmonary bypass. *Blood Coagul Fibrinolysis* 2008; **19**: 212–9
- 43 Carling MS, Jeppsson A, Wessberg P, Henriksson A, Baghaei F, Brisby H. Preoperative fibrinogen plasma concentration is associated with perioperative bleeding and transfusion requirements in scoliosis surgery. *Spine* 2011; **36**: 549–55
- 44 Fenger-Eriksen C, Jensen TM, Kristensen BS, et al. Fibrinogen substitution improves whole blood clot firmness after dilution with hydroxyethyl starch in bleeding patients undergoing radical cystectomy: a randomized, placebo-controlled clinical trial. *J Thromb Haemost* 2009; **7**: 795–802
- 45 Bolliger D, Görlinger K, Tanaka KA. Pathophysiology and treatment of coagulopathy in massive hemorrhage and hemodilution. *Anesthesiology* 2010; **113**: 1205–19
- 46 Fenger-Eriksen C, Moore GW, Rangarajan S, Ingerslev J, Sørensen B. Fibrinogen estimates are influenced by methods of measurement and hemodilution with colloid plasma expanders. *Transfusion* 2010; **50**: 2571–6
- 47 Spiezia L, Radu C, Marchioro P, et al. Peculiar whole blood rotation thromboelastometry (Rotem) profile in 40 sideropenic anaemia patients. *Thromb Haemostat* 2008; **100**: 1106–10
- 48 Ogawa S, Szlam F, Bolliger D, Nishimura T, Chen EP, Tanaka KA. The impact of hematocrit on fibrin clot formation assessed by rotational thromboelastometry. *Anesth Analg* 2012; **115**: 16–21
- 49 Solomon C, Rahe-Meyer N, Schöchl H, Ranucci M, Görlinger K. Effect of haematocrit on fibrin-based clot firmness in the FIBTEM assay. *Blood Transfus* 2012; **10**, accepted for publication
- 50 Coakley M, Reddy K, Mackie I, Mallett S. Transfusion triggers in orthotopic liver transplantation: a comparison of the thromboelastometry analyzer, the thromboelastogram, and conventional coagulation tests. *J Cardiothorac Vasc Anesth* 2006; **20**: 548–53

Handling editor: H. C. Hemmings
